# Supplementary material for: Virulence and Antimicrobial Resistance of Listeria monocytogenes Isolated from Ready-to-Eat Food Products in Romania
Source: MDPI journal article supplement (doi:10.3390/microorganisms12050954), 2024-05-08
Supplement: s1 [file s1]

Table S1: Target genes for serogroup, expected size of amplicons and primers used

| Target gene        | Size (bp) | Primer sequence (5'-3')                                        | Molecular group |     |     |     |     | Reference |
|--------------------|-----------|----------------------------------------------------------------|-----------------|-----|-----|-----|-----|-----------|
|                    |           |                                                                | IIa             | IIb | IIc | VIa | VIb |           |
| <i>prfA</i>        | 274       | GATACAGAAACATCGGTTGGC<br>GTGTAATCTTGATGCCATCAGG                | +               | +   | +   | +   | +   | 11        |
| <i>prs</i>         | 370       | GCT GAA GAG ATT GCG AAA GAA G<br>CAA AGA AAC CTT GGA TTT GCG G | +               | +   | +   | +   | +   | 12        |
| <i>orf</i><br>2819 | 471       | AGC AAA ATG CCA AAA CTC GT<br>CAT CAC TAA AGC CTC CCA TTG      | -               | +   | -   | -   | +   |           |
| <i>Orf</i><br>2110 | 597       | AGT GGA CAA TTG ATT GGT GAA<br>CAT CCA TCC CTT ACT TTG GAC     | -               | -   | -   | -   | +   |           |
| <i>lmo073</i><br>7 | 691       | AGG GCT TCA AGG ACT TAC CC<br>ACG ATT TCT GCT TGC CAT TC       | +               | -   | +   | -   | -   |           |
| <i>lmo</i><br>1118 | 906       | AGG GGT CTT AAA TCC TGG AA<br>CGG CTT GTT CGG CAT ACT TA       | -               | -   | +   | -   | -   |           |

Table S2: Target genes for virulence testing, expected size of amplicons and primers used

| Target gene | Size (bp) | Primer sequence (5'-3')                                   | Amplification condition                        | Reference |
|-------------|-----------|-----------------------------------------------------------|------------------------------------------------|-----------|
| <i>inlJ</i> | 238       | F-TGTAACCCCGCTTACACAGTT<br>R-AGCGGCTTGGCAGTCTAATA         | 95°C/5min<br>94°C/80s<br>58°C/90s<br>72°C/6min | 13        |
| <i>actA</i> | 650       | F-CCAAGCGAGGTAATACGGGA<br>R-GTCCGAAGCATTACCTCTTC          |                                                |           |
| <i>prfA</i> | 467       | F-ACCAATGGGATCCACAAGA<br>R-CAGCTGAGCTATGTGCGAT            |                                                |           |
| <i>hlyA</i> | 404       | F-ATCATCGACGGCAACCTCGGAGAC<br>R-CACCATTCCCAAGCTAAACCACTGC |                                                |           |
| <i>plcB</i> | 289       | F-AATATTTCAATCAATCGGTGGCTGA<br>R-GGGTAGTCCGCTTTCGCTCTT    |                                                |           |

Table S3: Primer sequence, expected product size and PCR annealing temperature used for the amplification of resistance genes.

| Targeted gene            | Expected size (bp) | Primer sequence           | Annealing temperature (°C) | Targeted antibiotic class     |
|--------------------------|--------------------|---------------------------|----------------------------|-------------------------------|
| <i>aad6</i>              | 978                | F: AGAAGATGTAATAATATAG    | 56                         | Streptomycin                  |
|                          |                    | R: CTGTAATCACTGTTCCCGCCT  |                            |                               |
| <i>cat</i>               | 384                | F: GAACAGGAATTAATAGTGAG   | 54                         | Chloramphenicol               |
|                          |                    | R: GGTAACCATCACATAC       |                            |                               |
| <i>dfrD</i>              | 199                | F: AGAGTAATCGGCAAGGATAACG | 56                         | Trimethoprim                  |
|                          |                    | R: AATGGGCAATTTCAATCC     |                            |                               |
| <i>ampC</i>              | 550                | F: TTCTATCAAMACTGGCARCC   | 60                         | Beta-lactams                  |
|                          |                    | R: CCYTTTTATGTACCCAYGA    |                            |                               |
| <i>bla<sub>TEM</sub></i> | 692                | F: TTCGTGTCGCCCTTATTCC    |                            |                               |
|                          |                    | R: CCGGCTCCAGATTATCAGC    |                            |                               |
| <i>blaz</i>              | 173                | F: ACTTCAACACCTGCTGCTTTC  |                            |                               |
|                          |                    | R: TGACCACTTTATCAGCAACC   |                            |                               |
| <i>Tet(A)</i>            | 210                | F: GCTACATCCTGCTTGCC TTC  | 55                         | Tetracycline                  |
|                          |                    | R: CATAGATCGCCGTGAAGAGG   |                            |                               |
| <i>Tet(B)</i>            | 659                | F: TTGGTTAGGGGCAAGTTTTG   |                            |                               |
|                          |                    | R: GTAATGGGCAATAACACCG    |                            |                               |
| <i>Tet(C)</i>            | 418                | F: CTTGAGAGCCTTCAACCCAG   |                            |                               |
|                          |                    | R: ATGGTCGTCATCTACCTGCC   |                            |                               |
| <i>Tet(K)</i>            | 361                | F: GTAGCGACAATAGGTAATAGT  |                            |                               |
|                          |                    | R: GTAGTGACAATAAACCTCCTA  |                            |                               |
| <i>Tet(L)</i>            | 267                | F: TCGTTAGCGTGCTGTCATTC   |                            |                               |
|                          |                    | R: GTATCCCACCAATGTAGCCG   |                            |                               |
| <i>Tet(M)</i>            | 159                | F: AGTGGAGCGATTACAGAA     |                            |                               |
|                          |                    | R: CATATGTCCTGGCGTGTCTA   |                            |                               |
| <i>Tet(S)</i>            | 589                | F: ATCAAGATATTAAGGAC      | 58                         |                               |
|                          |                    | R: TTCTCTATGTGGTAATC      |                            |                               |
| <i>SulI</i>              | 433                | F: CGGCGTGGGCTACCTGAACG   | 65                         | Trimethoprim/Sulfamethoxazole |
|                          |                    | R: GCCGATCGCGTGAAGTTCCG   |                            |                               |
| <i>SulIII</i>            | 293                | F: GCGCTCAAGGCAGATGGCATT  | 65                         |                               |
|                          |                    | R: GCGTTTGATACCGGCACCCGT  |                            |                               |
|                          |                    |                           |                            |                               |

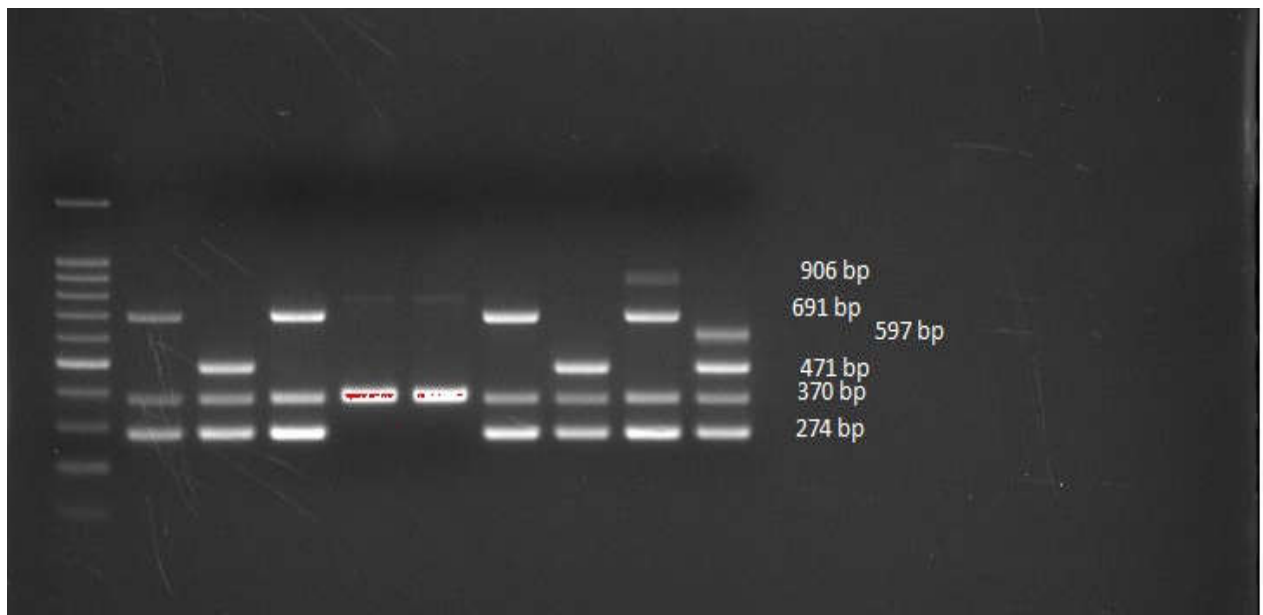

Figure S1: The electrophoretic profile of virulence genes detected in *Listeria monocytogenes* strains
